# Supplementary material for: Attenuated dengue viruses are genetically more diverse than their respective wild-type parents
Source: PubMed Central journal article supplement (PMC8138019; doi:10.1038/s41541-021-00340-5), 2021-05-20
Supplement: 41541_2021_340_MOESM2_ESM.pdf [file 41541_2021_340_MOESM2_ESM.pdf]

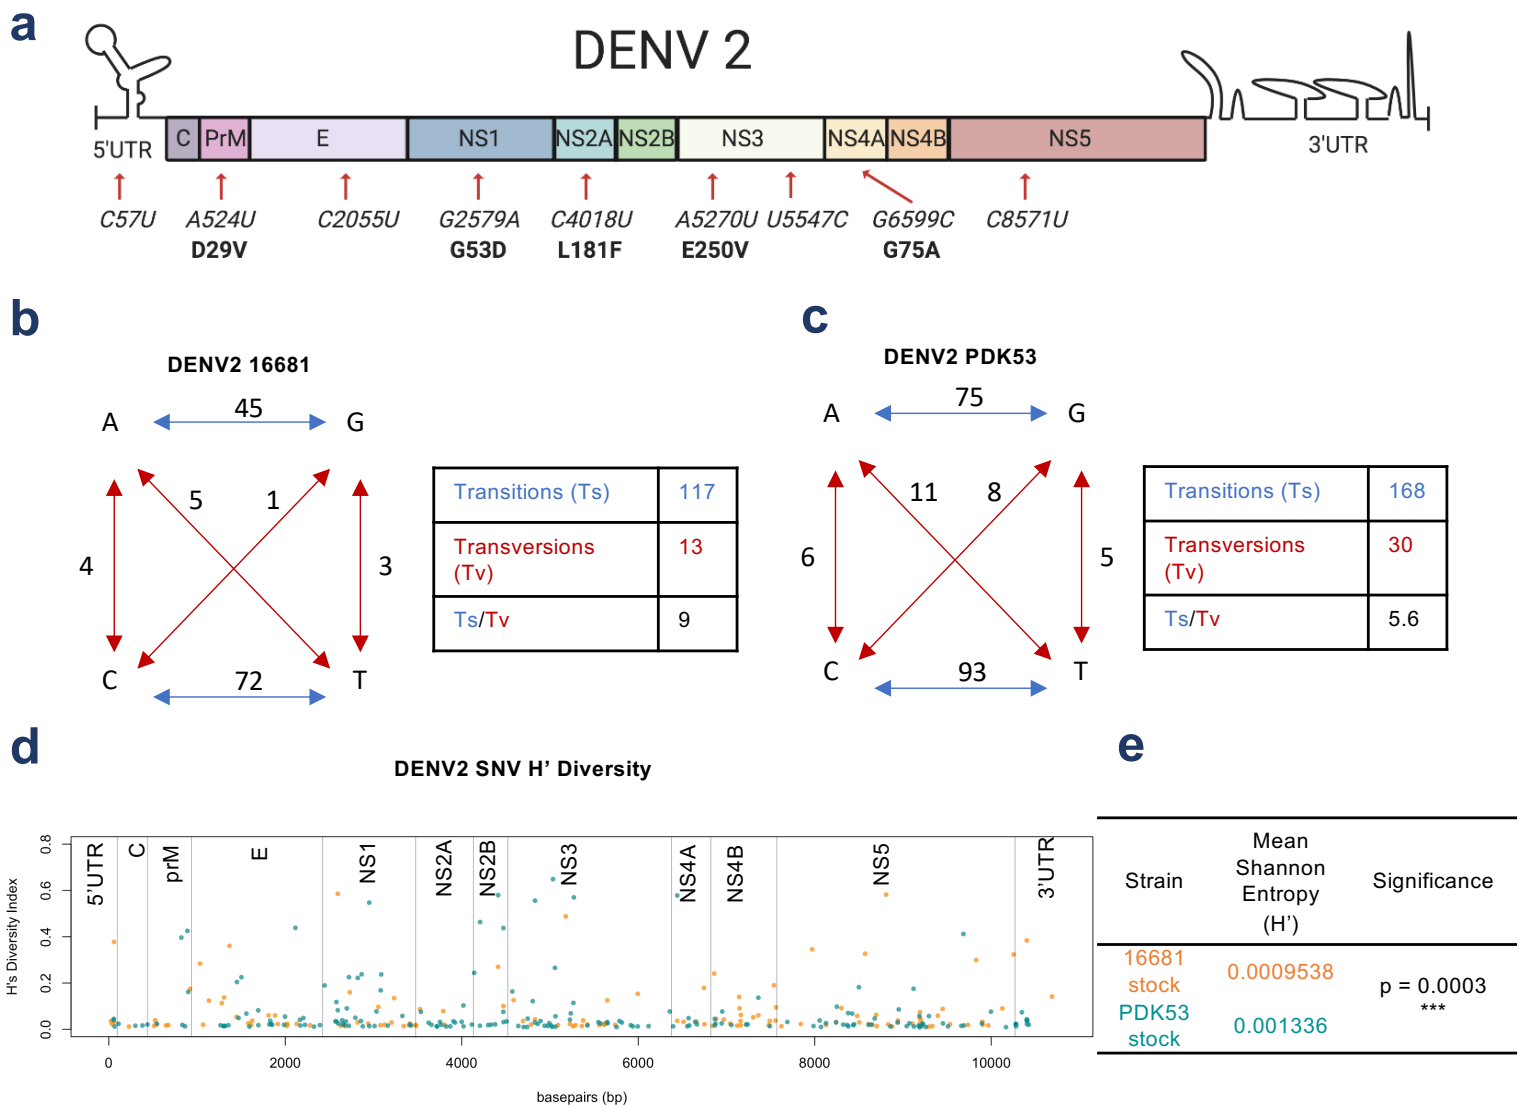

**Supplementary Figure 1. DENV2 PDK53 has elevated Shannon's entropy than DENV2 16681.** a) Schematic diagram of the DENV2 genome. Arrows indicating the mutations that occurred in 16681 to become PDK53. Nucleotide changes are indicated in italics while amino acid differences are shown in bold below the nucleotide position. Image created with Biorender. (b-c) The proportion of SNVs that resulted from transitions (blue) and transversions (red) in (b) 16681 and (c) PDK53. (d) Diversity, measured by Shannon's entropy depicted along the DENV2 genome for 16681 (orange) and PDK53 (teal). (e) The mean Shannon's entropy of each DENV2 genome. Significance was calculated using a Mann-Whitney U test.

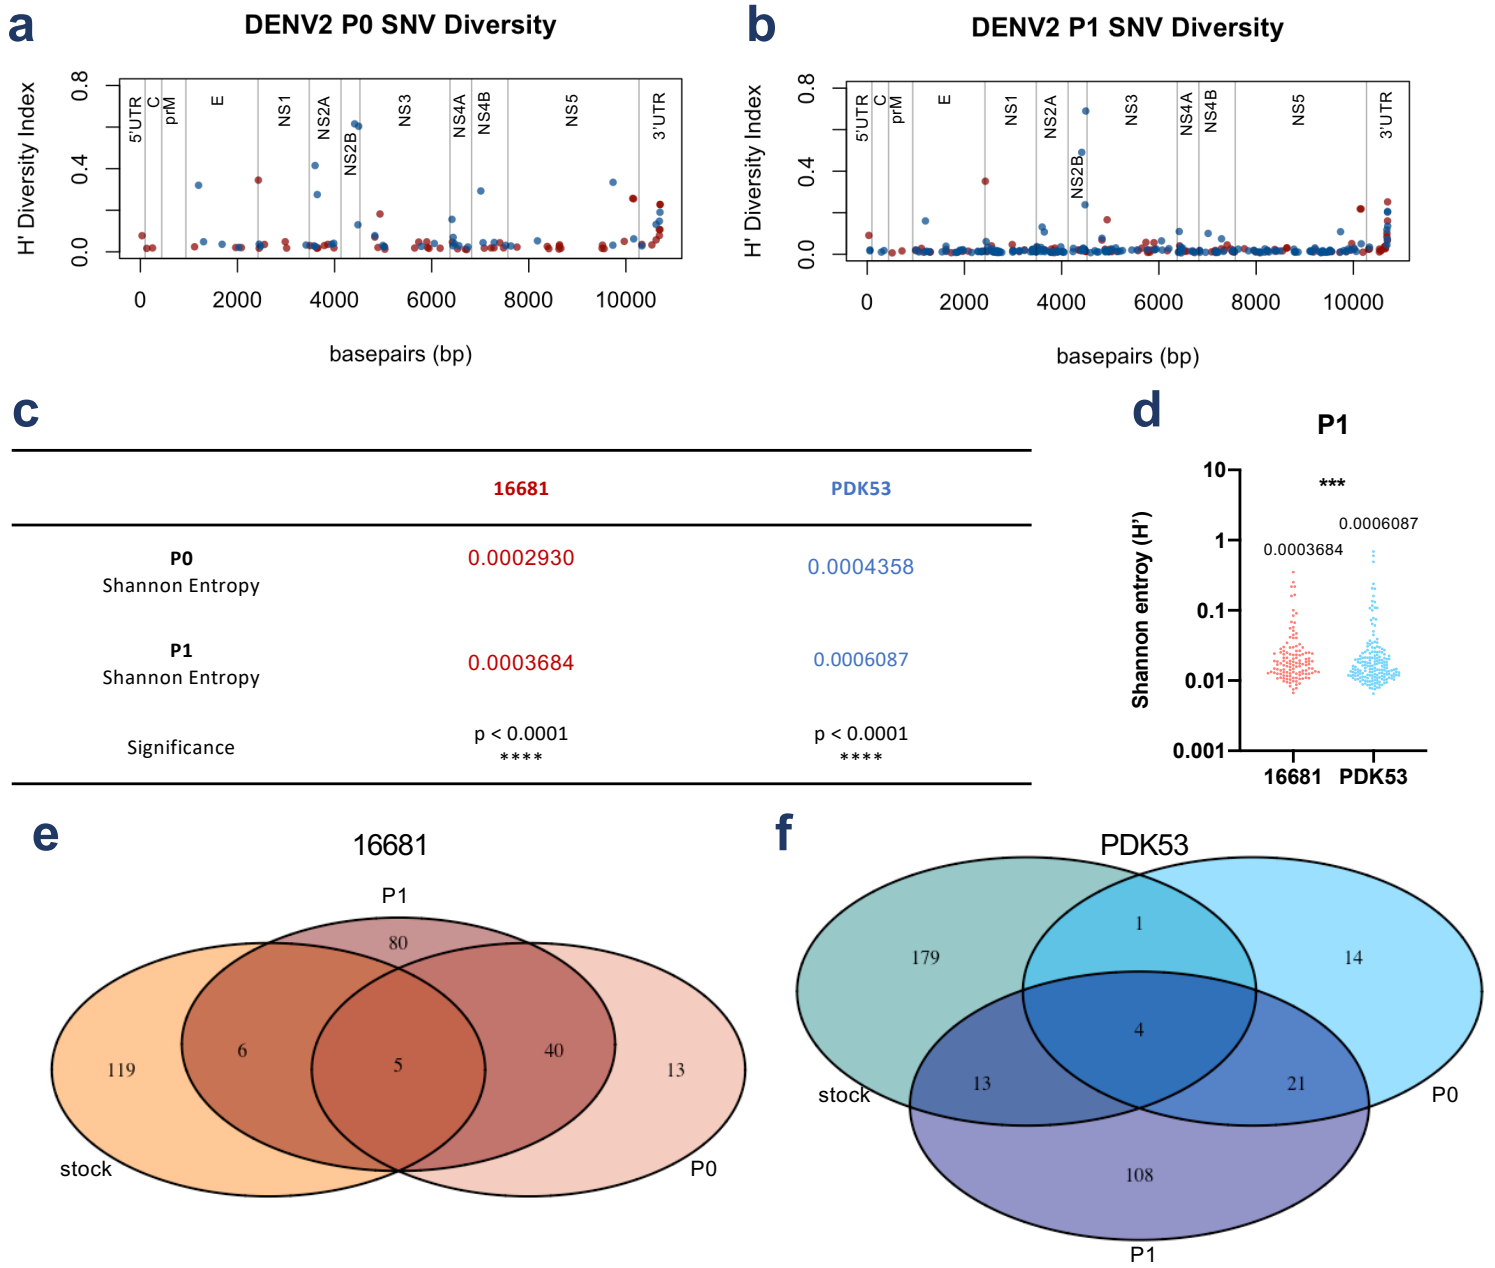

**Supplementary Figure 2. DENV2 PDK53 infectious clone has elevated Shannon's entropy than DENV2 16681 infectious clone.** (a-b) Shannon's entropy as a measurement of diversity at variant positions along the DENV2 genome of 16681 (red) and PDK53 (blue) at (a) passage 1 (P1) and (b) passage 0 (P0). (c) Mean genome diversity of DENV2 infectious clones at P0 and P1 of 16681 and PDK53. The whole genome diversity was assessed for significance by Mann Whitney U test. (d) Graphical representation of the SNV genome diversity of DENV2 16681 (red) and PDK53 (blue) infectious clones at P1. Diversity was statistically compared by Mann Whitney U test. (e-f) Venn diagram showing overlapping SNVs found in the stock virus, the infectious clone at P0 and at P1 for DENV1 16681(e) and PDK53(f).

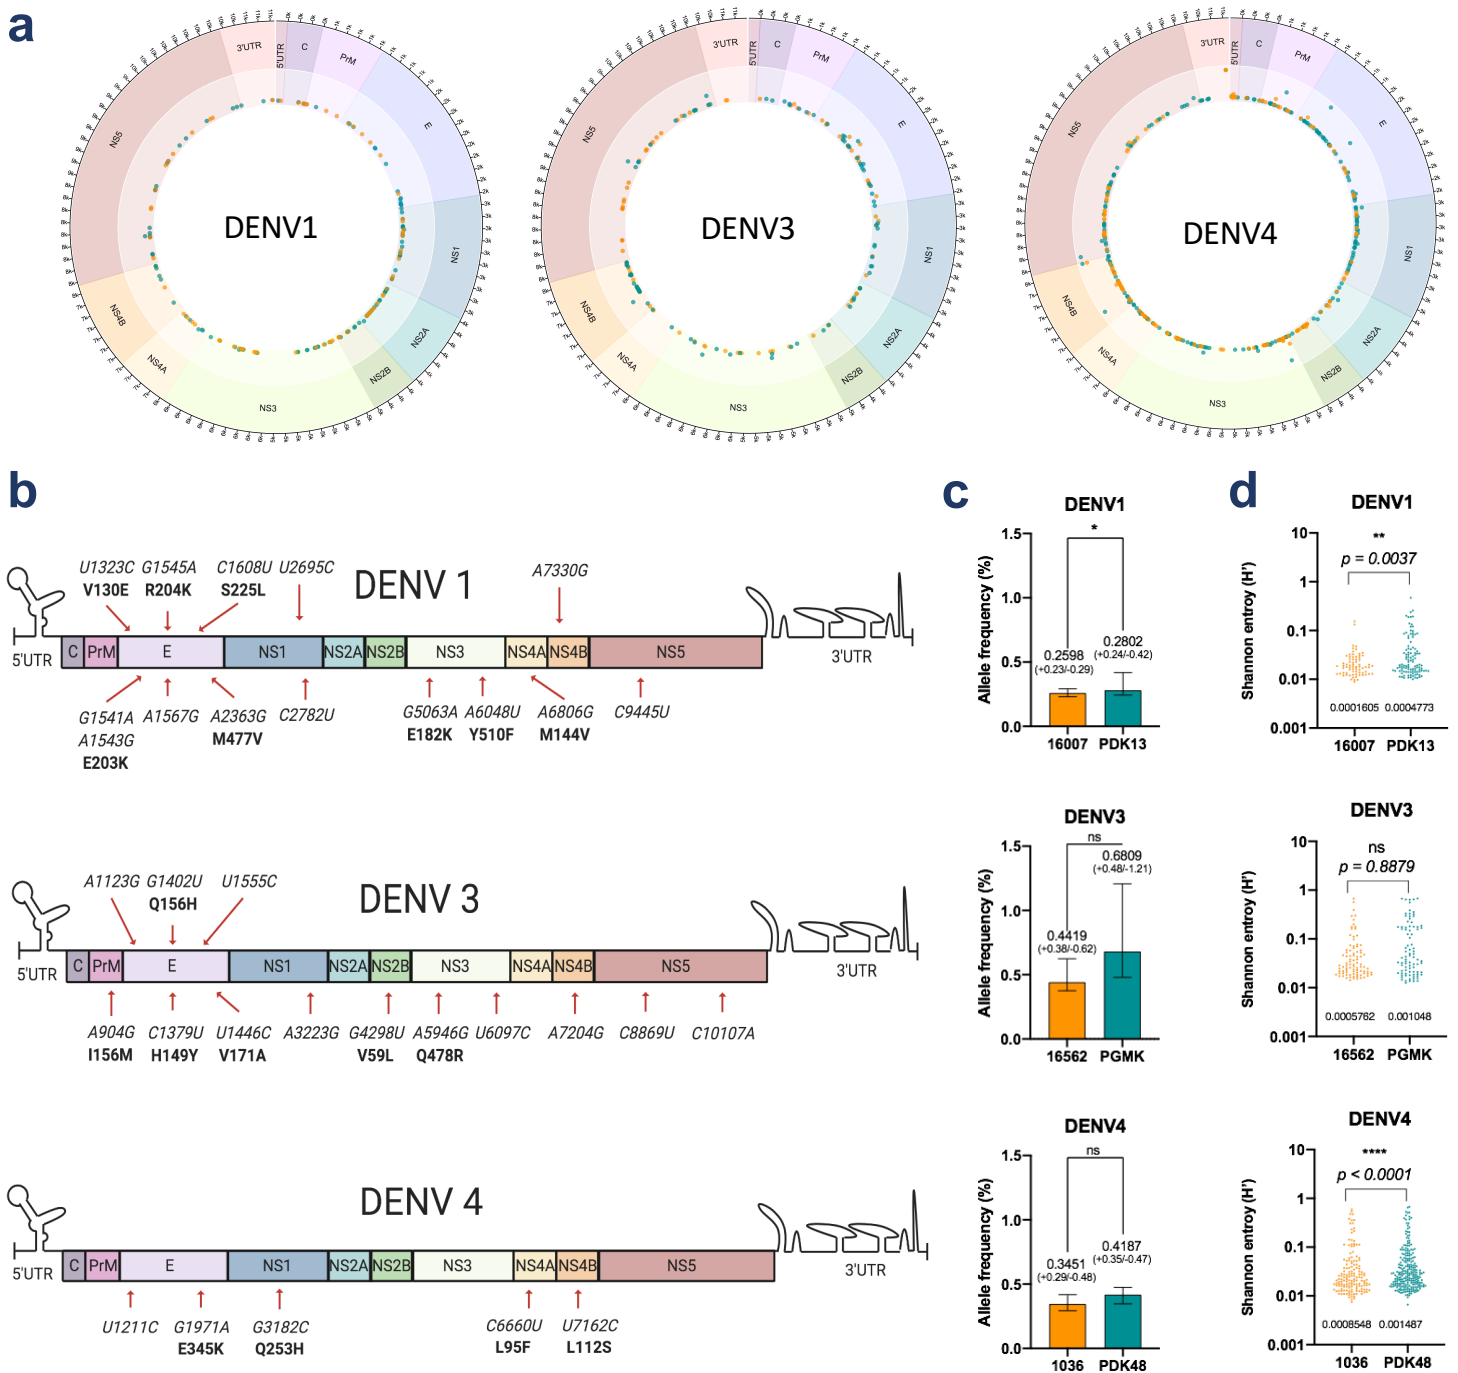

**Supplementary Figure 3. Genetic diversity following serial passage of DENV1, 3 and 4 serotypes.** (a) Circos plots of DENV1, 3 and 4 wild-type and vaccine strains. The outer track shows the genome and position, while the inner track shows the allele frequency of any alternate alleles for the wild-type strain (orange) and vaccine strain (teal) (b) Schematic diagram of DENV1, 3 and 4 genomes structure. Red arrows indicate the position of mutations (nucleotide changes are indicated in italics; amino acid difference are in bold). Images were created with Biorender. (c) The median allele frequency of SNVs in DENV1, 3 and 4. Statistical analysis was performed using Mann-Whitney U test. (d) SNV diversity in DENV1, 3 and 4 measured by Shannon's entropy. Significance was determined by Mann-Whitney U test.

**Supplementary Table 1:** Table depicting the SNVs with an allele frequency above 10% in (a) 16681 and (b) PDK53.

**a**

**DENV2 16681**

| Position | Ref allele | SNV allele | Amino acid substitution | Gene  |
|----------|------------|------------|-------------------------|-------|
| 59       | T          | C          | NA                      | 5'UTR |
| 1368     | C          | T          | silent                  | E     |
| 2595     | C          | T          | silent                  | NS1   |
| 5178     | A          | G          | silent                  | NS3   |
| 7971     | C          | T          | silent                  | NS5   |
| 8571     | C          | T          | silent                  | NS5   |
| 8809     | A          | G          | silent                  | NS5   |

**b**

**DENV2 PDK53**

| Position | Ref allele | SNV allele | Amino acid substitution | Gene  |
|----------|------------|------------|-------------------------|-------|
| 822      | G          | C          | L > F                   | prM   |
| 891      | A          | G          | silent                  | prM   |
| 2115     | G          | A          | silent                  | E     |
| 2951     | T          | C          | V > A                   | NS1   |
| 4207     | A          | G          | I > V                   | NS2B  |
| 4412     | C          | T          | T > I                   | NS2B  |
| 4830     | A          | G          | silent                  | NS3   |
| 5034     | T          | C          | silent                  | NS3   |
| 5270     | T          | A          | V > E                   | NS3   |
| 6442     | A          | G          | N > D                   | NS2B  |
| 9684     | A          | G          | silent                  | NS5   |
| 10403    | T          | C          | NA                      | 3'UTR |

**Supplementary Table 2. The number of SNVs identified in the DENV2 stock and infectious clones at P0 and P1 in C6/36 cells.** The number of variants with an allele frequency above 1% are indicated in brackets.

| <b>Virus</b> | <b>Stock SNVs (&gt; 1% AF)</b> | <b>P0 SNVs (&gt; 1% AF)</b> | <b>P1 SNVs (&gt; 1% AF)</b> |
|--------------|--------------------------------|-----------------------------|-----------------------------|
| 16681        | 130 (43)                       | 57 (13)                     | 125 (11)                    |
| PDK53        | 198 (52)                       | 40 (16)                     | 184 (18)                    |

**Supplementary Table 3. Average read coverage per nucleotide position.**

| <b>Strain</b>             | <b>Serotype</b> | <b>Average coverage per nucleotide (standard deviation)</b> |
|---------------------------|-----------------|-------------------------------------------------------------|
| PDK13 stock               | Dengue 1        | 7402.98 ± 743.90                                            |
| 16007 stock               |                 | 7752.59 ± 757.40                                            |
| PDK53 stock               | Dengue 2        | 7778.52 ± 719.36                                            |
| PDK53 P0 infectious clone |                 | 3646.18 ± 787.12                                            |
| PDK53 P1 infectious clone |                 | 7871.92 ± 652.48                                            |
| 16681 stock               |                 | 7740.27 ± 804.92                                            |
| 16681 P0 infectious clone |                 | 7736.79 ± 823.92                                            |
| 16681 P1 infectious clone |                 | 7861.20 ± 621.50                                            |
| PGMK stock                | Dengue 3        | 7693.97 ± 900.54                                            |
| 16562 stock               |                 | 7620.78 ± 850.96                                            |
| PDK48 stock               | Dengue 4        | 7820.62 ± 557.21                                            |
| 1036                      |                 | 7807.54 ± 587.38                                            |
